# Supplementary material for: Seasonal foraging behavior of Weddell seals in relation to oceanographic environmental conditions in the Ross Sea, Antarctica
Source: Copernicus journal article supplement (doi:10.5194/bg-21-5199-2024), 2024-11-21
Supplement: Supplementary file 1 [file bg-21-5199-2024-supplement.pdf]

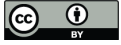

*Supplement of*

## **Seasonal foraging behavior of Weddell seals in relation to oceanographic environmental conditions in the Ross Sea, Antarctica**

**Hyunjae Chung et al.**

*Correspondence to:* Seung-Tae Yoon (styoon@knu.ac.kr) and Won Young Lee (wonyounglee@kopri.re.kr)

The copyright of individual parts of the supplement might differ from the article licence.

# Supplementary Materials

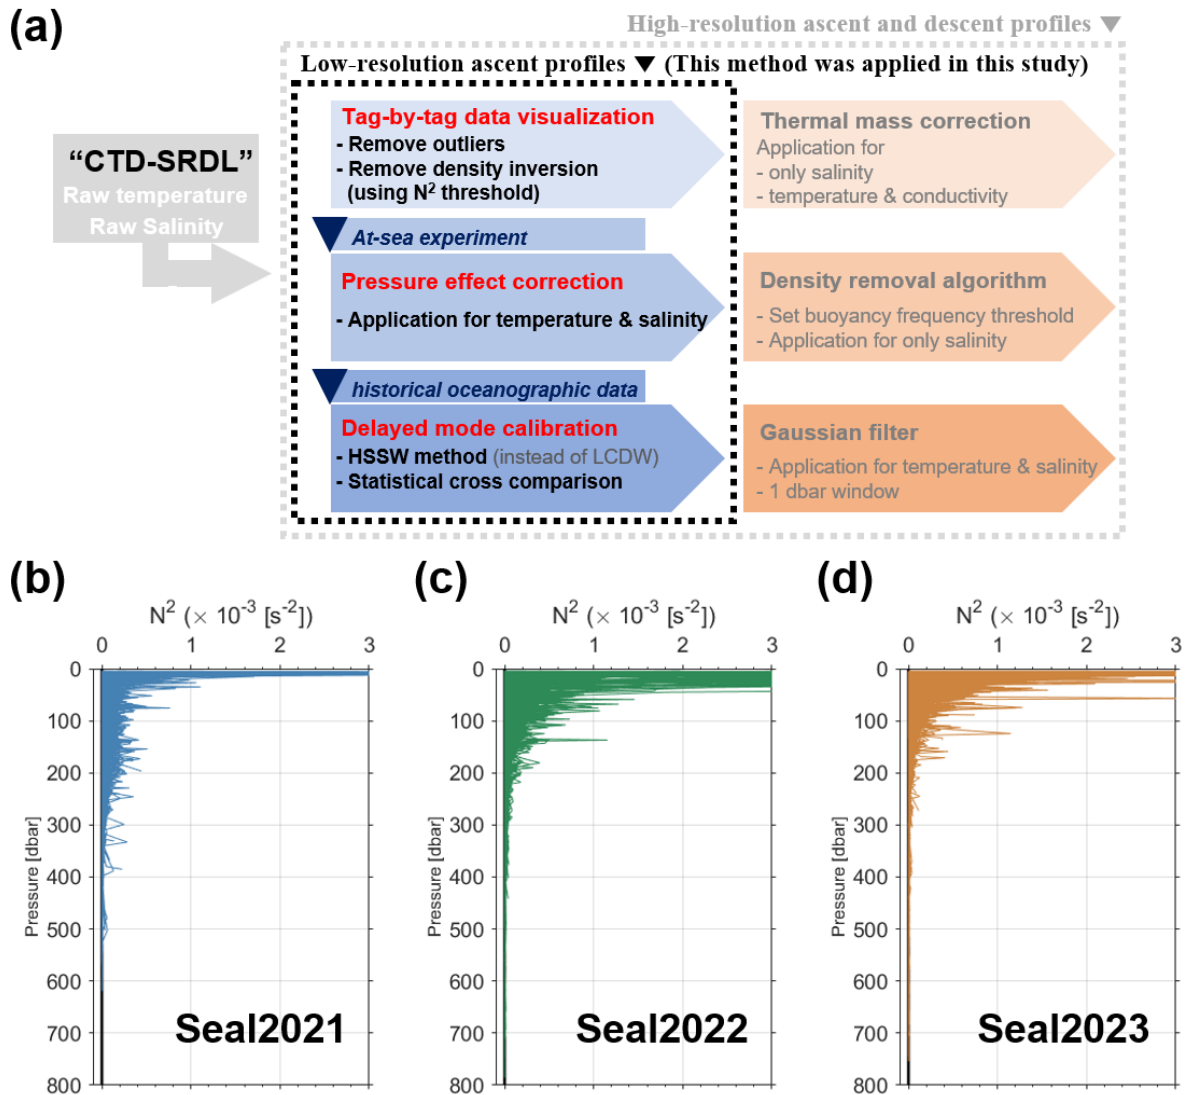

**Figure S1. Procedures for quality control of Seal-attached CTD data applied in this study.** (a) Schematic procedures for quality control of two cases of CTD-SRDL data (high-resolution ascent and descent profiles and low-resolution ascent profiles; reproduced from Fig. 2 in Yoon and Lee, 2021). The quality control method for low-resolution ascent profiles (dashed black box) was applied in this study. (b) Vertical profiles of buoyancy frequency ( $N^2$ ) estimated from QC completed 2021 Seal data, (c) for QC completed 2022 Seal data, and (d) for QC completed 2023 Seal data.

5

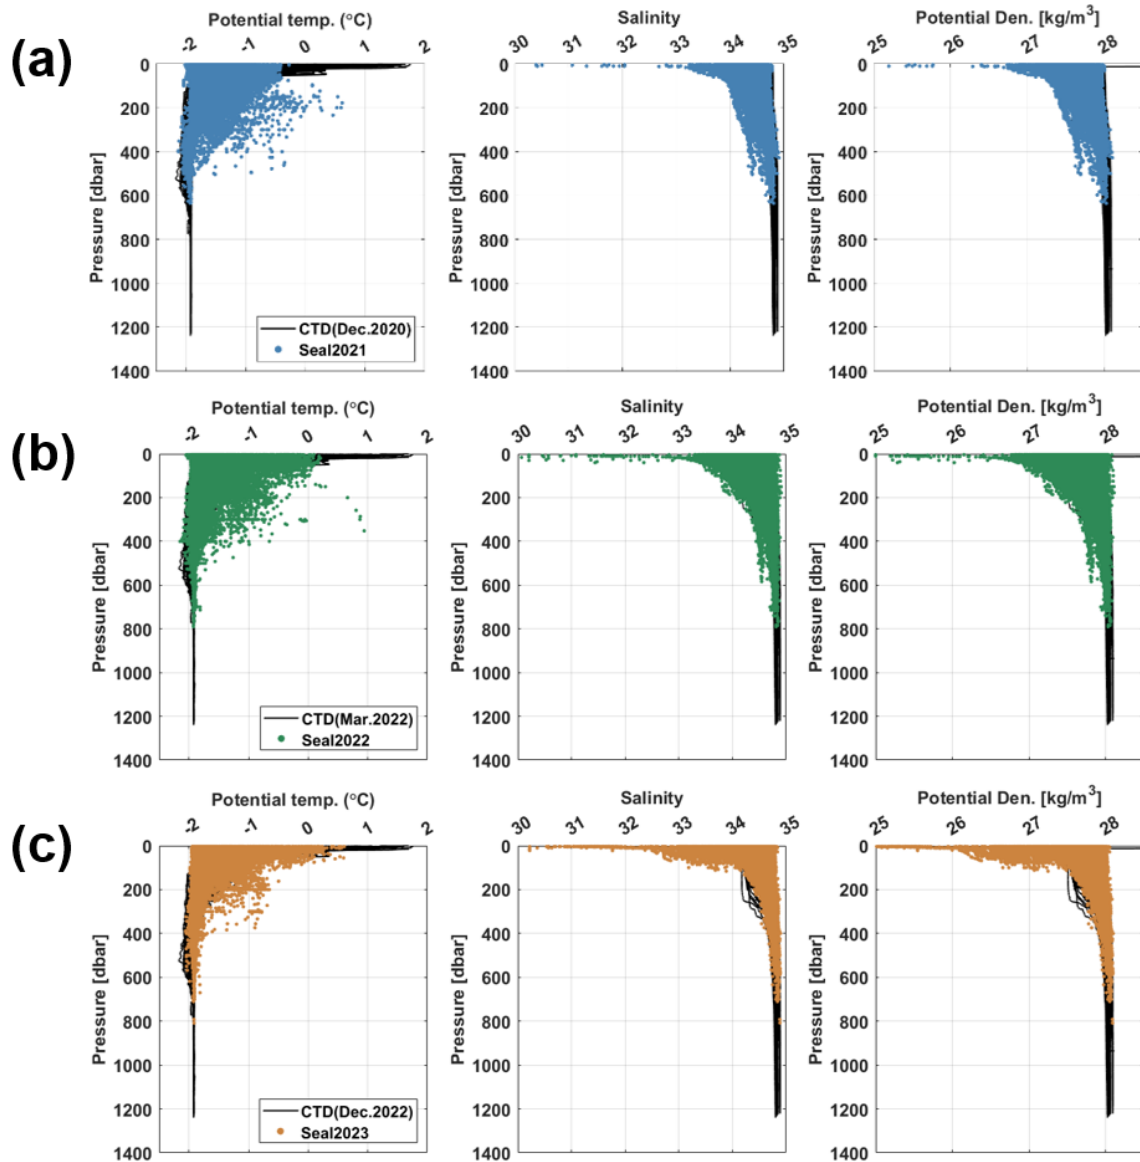

10

**Figure S2. Comparison of vertical profiles between ship-based CTD data and QC completed seal data.** (a) Vertical profiles of potential temperature, salinity, and potential density for QC completed 2021 Seal data and ship-based CTD data recorded from 6 to 25 December 2020. (b) Depicts the same information as panel (a), but for seal tagging data obtained during 2022 and ship-based CTD data recorded from 15 to 19 March, 2022. (c) Depicts the same information as panel (a), but for seal tagging data obtained during 2023 and ship-based CTD data recorded from 3 to 17 December, 2022.

15

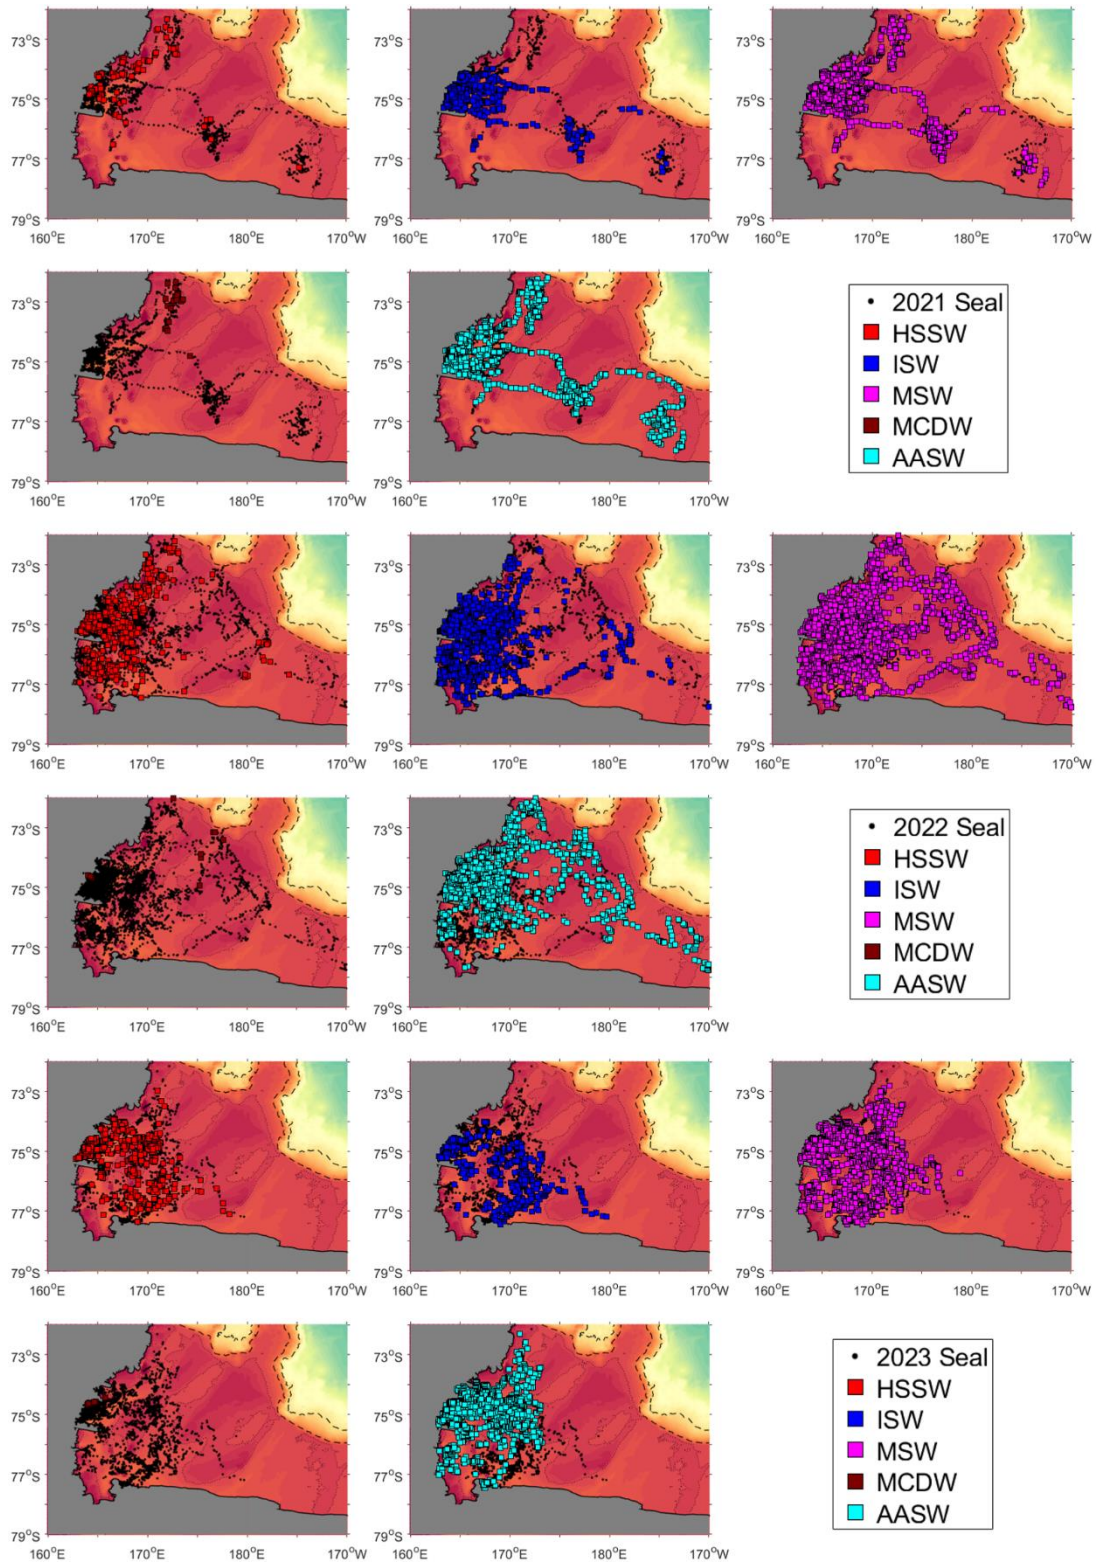

**Figure S3.** The oceanographic information obtained from the Seal-attached CTDs is spatially represented for 2021, 2022 and 2023. The 2021, 2022, and 2023 information is displayed above, in the middle, and below, respectively. Each color represents a different water mass.

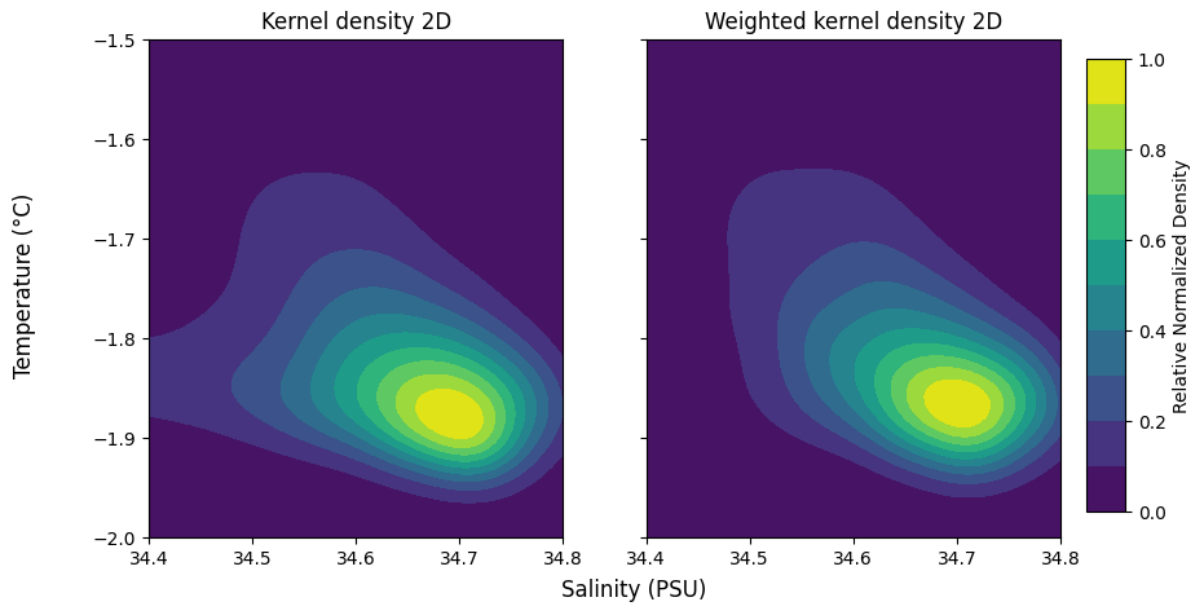

25 **Figure S4. Kernel Density Plots of Dive Behavior in TS Diagram.** (a) The kernel density plot of water temperature and salinity for each dive illustrates the dive distribution in the TS diagram. (b) The weighted kernel density plot is where the density is weighted by the number of PrCA (Prey Capture Attempts) events for each dive. Both plots are based on data collected from seal-attached CTD sensors, which provide temperature, salinity, and PrCA data for each dive. The density was highest around a salinity of 34.7 PSU and a temperature of -1.85 °C for both sides. Kernel densities were min-max normalized in each plot, respectively.

30

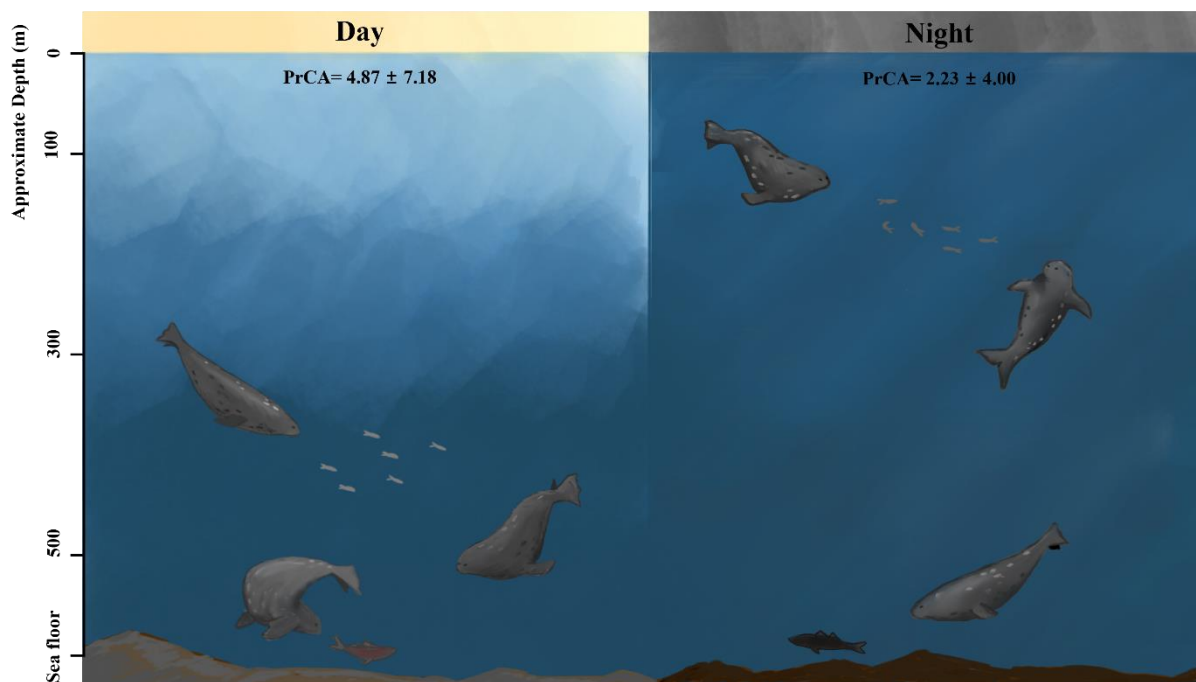

35 **Figure S5.** Schematic summary of diel changes in diving behaviors. During the day, pelagic preys may move to deeper waters, consequently increasing in the diving depth of Weddell seals, with a higher proportion of benthic dives observed. PrCA values are presented as mean ± standard deviation. Note: The high variability of PrCA events results in SD values being larger than the mean values.

**Table S1. Metadata for captured Weddell seals. In the zoletil volume, “None” indicates that the seals were deployed with no anesthesia. Blanks mean that no**

| Identification | Age   | Sex | Body Length (m) | Capture Date | Logger Type       | Tagged Part | Administered dose of Zoletil 50 (ml) |
|----------------|-------|-----|-----------------|--------------|-------------------|-------------|--------------------------------------|
| 329            | Adult | F   | 2.60            | 2021-02-16   | CTD-SRDL          | back        | None                                 |
| 330            | Adult | M   | -               | 2021-02-16   | CTD-SRDL          | back        | None                                 |
| 333            | Adult | F   | 2.00            | 2021-02-18   | CTD-SRDL          | head        | 5                                    |
| 334            | Adult | M   | 2.20            | 2021-02-19   | CTD-SRDL          | head        | 5                                    |
| 335            | Adult | M   | 2.00            | 2021-02-19   | CTD-SRDL          | head        | 5                                    |
| 344            | Adult | M   | 2.50            | 2021-02-19   | CTD-SRDL          | head        | 5                                    |
| 337            | Adult | F   | 2.50            | 2021-02-20   | CTD-SRDL          | head        | 5                                    |
| 343            | Adult | M   | 2.40            | 2021-02-20   | CTD-SRDL          | head        | 5                                    |
| 345            | Adult | F   | 2.10            | 2021-02-21   | CTD-SRDL          | head        | 5                                    |
| 346            | Adult | F   | 2.30            | 2021-02-22   | CTD-SRDL          | head        | 5                                    |
| 347            | Adult | M   | 2.30            | 2021-02-23   | CTD-SRDL          | head        | 5                                    |
| 348            | Adult | M   | 1.90            | 2021-02-23   | CTD-SRDL          | head        | 5                                    |
| 349            | Adult | M   | 2.30            | 2021-02-24   | CTD-SRDL          | head        | 5                                    |
| 350            | Adult | F   | 2.20            | 2021-02-24   | CTD-SRDL          | head        | 4                                    |
| 351            | Adult | F   | 2.50            | 2021-02-25   | CTD-SRDL          | head        | 5                                    |
| 352            | Adult | M   | 2.40            | 2021-02-25   | CTD-SRDL          | head        | 5                                    |
| 353            | Adult | F   | 2.40            | 2021-02-26   | CTD-SRDL          | head        | 5                                    |
| 354            | Adult | F   | 2.50            | 2021-02-27   | CTD-SRDL          | head        | 5                                    |
| 369            | Adult | F   | 2.20            | 2021-02-27   | CTD-SRDL          | head        | 5                                    |
| G5             | Adult | M   | 2.60            | 2021-03-04   | CTD-SRDL with GPS | back        | 3.5                                  |
| G2             | Adult | F   | 2.50            | 2021-03-04   | CTD-SRDL with GPS | back        | 3.5                                  |
| G3             | Adult | F   | 2.40            | 2021-03-04   | CTD-SRDL with GPS | back        | 3.5                                  |
| G4             | Adult | F   | 2.40            | 2021-03-07   | CTD-SRDL with GPS | back        | 3.5                                  |

|      |       |   |      |            |                      |      |     |
|------|-------|---|------|------------|----------------------|------|-----|
| G1   | Adult | M | 2.40 | 2021-03-07 | CTD-SRDL<br>with GPS | back | 3.5 |
| 553  | Adult | M | 1.80 | 2022-02-15 | CTD-SRDL             | head | 5   |
| 551  | Adult | F | 1.85 | 2022-02-16 | CTD-SRDL             | head | 4   |
| 552  | Adult | M | 1.85 | 2022-02-17 | CTD-SRDL             | head | 4   |
| G605 | Adult | M | 1.90 | 2022-02-18 | CTD-SRDL<br>with GPS | back | 4   |
| 547  | Adult | M | 1.90 | 2022-02-22 | CTD-SRDL             | head | 4   |
| 387  | Adult | M | 2.20 | 2022-02-23 | CTD-SRDL             | head | 4.5 |
| 549  | Adult | F | 2.00 | 2022-02-23 | CTD-SRDL             | head | 4   |
| 581  | Adult | M | 2.30 | 2022-02-24 | CTD-SRDL             | head | 5   |
| G606 | Adult | M | 1.70 | 2022-02-24 | CTD-SRDL<br>with GPS | back | 3.5 |
| 580  | Adult | M | 2.05 | 2022-02-28 | CTD-SRDL             | head | 4   |
| 582  | Adult | F | 1.80 | 2022-02-28 | CTD-SRDL             | head | 3.5 |
| 430  | Adult | M | 2.20 | 2022-03-01 | CTD-SRDL             | head | 4   |
| 426  | Adult | M | 2.15 | 2022-03-04 | CTD-SRDL             | head | 4   |
| 427  | Adult | F | 2.20 | 2022-03-04 | CTD-SRDL             | head | 4   |
| 583  | Adult | M | 2.00 | 2022-03-04 | CTD-SRDL             | head | 4   |
| 548  | Adult | F | 2.00 | 2022-03-05 | CTD-SRDL             | head | 4   |
| 584  | Adult | F | 2.15 | 2022-03-06 | CTD-SRDL             | head | 5   |
| 386  | Adult | M | 2.15 | 2022-03-06 | CTD-SRDL             | Head | 4.5 |
| 592  | Adult |   | 1.87 | 2023-01-30 | CTD-SRDL             | head | 5   |
| 608  | Adult | F | 2.3  | 2023-01-31 | CTD-SRDL             | head | 5   |
| 603  | Adult | M | 2.1  | 2023-01-31 | CTD-SRDL             | head | 5   |
| 772  | Adult | F | 2.08 | 2023-01-31 | CTD-SRDL             | head | 4   |
| 457  | Adult | M |      | 2023-02-01 | CTD-SRDL             | head | 3   |
| 320  | Adult | M | 1.82 | 2023-02-02 | CTD-SRDL             | head | 3.5 |
| 376  | Adult | F | 2.2  | 2023-02-02 | CTD-SRDL             | head | 4   |
| 324  | Adult | F | 1.97 | 2023-02-04 | CTD-SRDL             | head | 4   |
| 654  | Adult | F | 2.18 | 2023-02-04 | CTD-SRDL             | head | 4   |
| 590  | Adult | M | 1.8  | 2023-02-04 | CTD-SRDL             | head | 3.5 |
| 451  | Adult |   | 2.26 | 2023-02-04 | CTD-SRDL             | head | 5   |

|     |          |   |      |            |          |      |   |
|-----|----------|---|------|------------|----------|------|---|
| 368 | Adult    | M | 1.95 | 2023-02-04 | CTD-SRDL | head | 5 |
| 550 | Subadult | M | 1.7  | 2023-02-04 | CTD-SRDL | head | 2 |
| 690 | Subadult | M | 1.68 | 2023-02-04 | CTD-SRDL | head | 2 |
| 735 | Adult    | F | 2    | 2023-02-05 | CTD-SRDL | head | 5 |
| 602 | Adult    | M | 2    | 2023-02-05 | CTD-SRDL | head | 5 |
| 693 | Adult    | F | 2.15 | 2023-02-05 | CTD-SRDL | head | 5 |
| 782 | Adult    | M | 2.1  | 2023-02-05 | CTD-SRDL | head | 5 |
| 692 | Adult    | M | 2.1  | 2023-02-05 | CTD-SRDL | head | 5 |
| 601 | Adult    | M | 2.05 | 2023-02-05 | CTD-SRDL | head | 5 |
| 773 | Adult    | F | 2.4  | 2023-02-05 | CTD-SRDL | head | 5 |
| 694 | Adult    | M | 2.1  | 2023-02-05 | CTD-SRDL | head | 5 |

40

**Table S2 Error metrics for kriging estimates of salinity and temperature (2021-2023)**

| Year | Temperature (ME) | Temperature (RMSE) | Temperature (MAE) | Salinity (ME) | Salinity (RMSE) | Salinity (MAE) |
|------|------------------|--------------------|-------------------|---------------|-----------------|----------------|
| 2021 | 0.0012           | 0.1859             | 0.1131            | 0.0001        | 0.1107          | 0.0766         |
| 2022 | 0.0022           | 0.1496             | 0.0846            | 0.0001        | 0.1297          | 0.0891         |
| 2023 | 0.0054           | 0.1764             | 0.1073            | 0.0004        | 0.1883          | 0.1111         |

ME: Mean Error, RMSE: Root Mean Squared Error, MAE: Mean Absolute Error.

45

**Table S3. Comparison of models predicting prey capture attempts using the Akaike Information Criterion (AIC) and Bayesian Information Criterion (BIC) values**

| AIC      | BIC      | Explanatory Variable (Fixed effects) |
|----------|----------|--------------------------------------|
| 129327.5 | 129435.5 | WM_f+Benthic+D_Month_f               |
| 129331.3 | 129448.3 | WM_f+Benthic+Sex+D_Month_f           |
| 129333.9 | 129459.9 | WM_f+Benthic+D_Month_f+C_Year        |
| 129337.5 | 129472.5 | WM_f+Benthic+Sex+D_Month_f+C_Year    |



|          |          |                              |
|----------|----------|------------------------------|
| 129503.5 | 129575.4 | WM_f+Benthic                 |
| 129507.6 | 129588.6 | WM_f+Benthic+Sex             |
| 129510.9 | 129600.9 | WM_f+Benthic+C_Year          |
| 129514.9 | 129613.9 | WM_f+Benthic+Sex+C_Year      |
| 129817.9 | 129916.9 | WM_f+D_Month_f               |
| 129818.3 | 129899.2 | Benthic+D_Month_f            |
| 129821.6 | 129911.6 | Benthic+Sex+D_Month_f        |
| 129821.8 | 129929.7 | WM_f+Sex+D_Month_f           |
| 129823.3 | 129922.3 | Benthic+D_Month_f+C_Year     |
| 129823.6 | 129940.6 | WM_f+D_Month_f+C_Year        |
| 129826.7 | 129934.7 | Benthic+Sex+D_Month_f+C_Year |
| 129827.3 | 129953.2 | WM_f+Sex+D_Month_f+C_Year    |
| 129935.7 | 129980.7 | Benthic                      |
| 129939.4 | 129993.4 | Benthic+Sex                  |
| 129941.8 | 130004.8 | Benthic+C_Year               |
| 129945.6 | 130017.5 | Benthic+Sex+C_Year           |
| 130013.6 | 130076.6 | WM_f                         |
| 130017.9 | 130089.8 | WM_f+Sex                     |
| 130020.6 | 130101.6 | WM_f+C_Year                  |
| 130024.6 | 130114.6 | WM_f+Sex+C_Year              |

|          |          |                      |
|----------|----------|----------------------|
| 130434   | 130505.9 | D_Month_f            |
| 130437.4 | 130518.3 | Sex+D_Month_f        |
| 130438.2 | 130528.2 | D_Month_f+C_Year     |
| 130441.7 | 130540.6 | Sex+D_Month_f+C_Year |
| 130551.5 | 130596.5 | Sex                  |
| 130553.4 | 130607.4 | C_Year               |
| 130557.2 | 130620.1 | Sex+C_Year           |

**Table S4. Comparison of models predicting diving depth using AIC (Akaike Information Criterion) and BIC (Bayesian Information Criterion) values**

| AIC      | BIC      | Explanatory Variable (Fixed effects) |
|----------|----------|--------------------------------------|
| 711620.3 | 711719.3 | Sex+D_Month_f+C_Year                 |
| 711625.3 | 711715.3 | D_Month_f+C_Year                     |
| 711632.2 | 711713.2 | Sex+D_Month_f                        |
| 711637.2 | 711709.2 | D_Month_f                            |
| 711744.3 | 711807.3 | Sex+C_Year                           |
| 711749.3 | 711803.2 | C_Year                               |
| 711757   | 711802   | Sex                                  |

50 **Table S5 The best model for prey capture attempts (PrCA) including interaction term between julian date and dive type**  
 The comparison of AIC values revealed that Water mass and interaction term between julian date and dive type are important variables for predicting PrCA.

$$\log(\text{PCA\_BTM} + 1) \sim \text{Water Mass} + \text{Dive Type} * \text{Julian date} + (1|\text{IID}) + \text{corAR1}(1|\text{IID})$$

| <i>Predictors</i> | <i>Estimates</i> | <i>CI</i>   | <i>p</i> |
|-------------------|------------------|-------------|----------|
| (Intercept)       | 1.28             | 1.08 – 1.47 | <0.001   |

|                                   |            |                             |                  |
|-----------------------------------|------------|-----------------------------|------------------|
| Water Mass [ISW]                  | -0.09      | -0.26 – 0.09                | 0.327            |
| Water Mass [MSW]                  | -0.09      | -0.26 – 0.08                | 0.315            |
| Water Mass [AASW]                 | -0.4       | -0.57 – -0.23               | <b>&lt;0.001</b> |
| Dive Type [Benthic]               | -0.15      | -0.21 – -0.09               | <b>&lt;0.001</b> |
| Julian date                       | -0.0032679 | -0.00304957–<br>-0.00348623 | <b>&lt;0.001</b> |
| Dive Type [Benthic] × Julian Date | 0.0033987  | 0.00365321–<br>0.00314419   | <b>&lt;0.001</b> |
| N IID                             | 44         |                             |                  |
| <hr/>                             |            |                             |                  |
| Observations                      | 59675      |                             |                  |
| <hr/> <hr/>                       |            |                             |                  |
